# Supplementary material for: Identification of Hub Genes and Their Correlation With Immune Infiltration Cells in Hepatocellular Carcinoma Based on GEO and TCGA Databases
Source: Front Genet. 2021 Apr 30;12:647353. doi: 10.3389/fgene.2021.647353 (PMC8120231; doi:10.3389/fgene.2021.647353)
Supplement: Supplementary Table 3 — Top 40 genes from protein-protein network ranked by 12 different algorithms of cytohubba including Degree, DMNC, EPC, MCC, MNC, Bottleneck, Closeness, EcCentricity, Radiality, Betweenness, Stress and Clustering Coefficient. [file Table_3.XLS]

## Sheet: 647353_Data_Sheet1_top40 genes
	Node_name
Ranking	MCC	DMNC	MNC	Degree	EPC	BottleNeck	EcCentricity	Closeness	Radiality	Betweenness	Stress	ClusteringCoefficient
1	CDK1	TTK	CDK1	CDK1	CDK1	CDC20	CDC20	CDK1	CDK1	CDK1	CDK1	ZWINT
2	CDC20	KIF4A	CDC20	CDC20	CDC20	CDK1	CDK1	CDC20	CDC20	RFC4	CDC20	CDC7
3	CCNB2	NEK2	CCNB2	CCNB2	CCNB1	TOP2A	TOP2A	CCNB2	CCNB2	HMMR	CCNB2	TRIP13
4	CCNA2	KIF20A	CCNA2	CCNA2	CCNB2	PBK	UBE2C	CCNA2	CCNA2	CDC20	CCNA2	E2F8
5	CCNB1	MKI67	CCNB1	CCNB1	CCNA2	UBE2C	RFC4	CCNB1	BUB1	CCNB2	RHOB	TK1
6	BUB1	CEP55	BUB1	BUB1	BUB1	HMMR	TPX2	BUB1	CCNB1	CCNA2	HMMR	FAM83D
7	TOP2A	PTTG1	TOP2A	TOP2A	AURKB	RFC4	CCNB2	TOP2A	TOP2A	MCM2	RFC4	GINS1
8	BUB1B	NUSAP1	AURKB	AURKB	KIF2C	TPX2	MAD2L1	MAD2L1	MAD2L1	UBE2C	PRC1	FANCI
9	AURKB	MELK	MAD2L1	MAD2L1	BUB1B	FOXM1	MCM7	AURKB	AURKB	TPX2	MCM2	LYVE1
10	MAD2L1	FOXM1	BUB1B	BUB1B	TOP2A	TYMS	MCM3	BUB1B	KIF11	BUB1	FOXM1	STAB2
11	KIF11	KIF2C	KIF11	KIF11	KIF20A	CDC25C	CCNB1	KIF11	AURKA	FOXM1	CCNB1	FCN2
12	NDC80	NUF2	NDC80	NDC80	ASPM	IGFBP3	CCNA2	NDC80	BUB1B	CCNB1	BUB1	COLEC10
13	KIF2C	PBK	KIF2C	KIF2C	MAD2L1	CCNB2	BUB1	KIF2C	NDC80	RHOB	TOP2A	FCN3
14	DLGAP5	DLGAP5	DLGAP5	DLGAP5	NUSAP1	MAD2L1	AURKB	AURKA	KIF2C	TOP2A	CDKN2A	SPC25
15	NUSAP1	NCAPG	NUSAP1	NUSAP1	UBE2C	RRM2	KIF2C	DLGAP5	RRM2	CDKN2A	RACGAP1	KNTC1
16	ASPM	ASPM	RRM2	RRM2	NDC80	HJURP	BUB1B	RRM2	UBE2C	MAD2L1	MAD2L1	MKI67
17	AURKA	AURKA	UBE2C	UBE2C	TPX2	MCM7	KIF20A	UBE2C	NUSAP1	PRC1	MCM3	CDKN3
18	UBE2C	ZWINT	AURKA	AURKA	KIF11	MCM3	NUSAP1	NUSAP1	DLGAP5	MCM3	TPX2	NEK2
19	RRM2	SPC25	ASPM	ASPM	AURKA	MCM2	KIF11	ASPM	TPX2	AURKA	MCM7	KIF4A
20	KIF20A	KNTC1	NCAPG	NCAPG	PBK	RHOB	AURKA	TPX2	ASPM	RRM2	UBE2C	UHRF1
21	NCAPG	UBE2C	KIF20A	KIF20A	CEP55	UBE2T	CEP55	NCAPG	NCAPG	MCM7	ECT2	CENPW
22	TPX2	NDC80	TPX2	TPX2	NCAPG	CDKN2A	MELK	KIF20A	KIF20A	RACGAP1	KIF11	TTK
23	PBK	TPX2	PBK	PBK	DLGAP5	CCNB1	PBK	PBK	PBK	AURKB	AURKB	ANLN
24	CEP55	CDKN3	CEP55	CEP55	RRM2	CCNA2	HMMR	CEP55	CEP55	TYMS	AURKA	PTTG1
25	TTK	KIF11	TTK	TTK	TTK	BUB1	FOXM1	MELK	MELK	NDC80	RRM2	FOXM1
26	MELK	PRC1	MELK	MELK	PRC1	AURKB	TYMS	TTK	PRC1	BUB1B	NDC80	KPNA2
27	PRC1	BUB1B	PRC1	PRC1	MELK	KIF2C	CDC25C	PRC1	TTK	ECT2	BUB1B	GMNN
28	NUF2	RACGAP1	NUF2	NUF2	NUF2	BUB1B	RRM2	NUF2	KIF4A	KIF11	TYMS	CKS2
29	KIF4A	RRM2	KIF4A	KIF4A	NEK2	KIF20A	HJURP	KIF4A	PTTG1	DLGAP5	DLGAP5	NUF2
30	PTTG1	HJURP	PTTG1	PTTG1	KIF4A	ASPM	MCM2	PTTG1	RACGAP1	ASPM	NUSAP1	CEP55
31	NEK2	AURKB	NEK2	NEK2	PTTG1	NUSAP1	UBE2T	NEK2	NUF2	NCAPG	CDC25C	KIF20A
32	RACGAP1	TOP2A	HJURP	HJURP	RACGAP1	NDC80	ASPM	RACGAP1	NEK2	PBK	ASPM	MELK
33	HJURP	BUB1	RACGAP1	RACGAP1	HJURP	KIF11	NDC80	HJURP	MCM2	NUSAP1	NCAPG	CENPM
34	MKI67	MAD2L1	MKI67	MKI67	MKI67	AURKA	NCAPG	MCM2	MCM3	HJURP	KIF2C	CENPU
35	FOXM1	CENPM	FOXM1	FOXM1	FOXM1	CEP55	DLGAP5	MCM3	HJURP	KIF2C	PBK	RACGAP1
36	CENPM	CENPU	CDC6	MCM2	CENPM	NCAPG	TTK	FOXM1	MCM7	CDC6	CEP55	NUSAP1
37	CENPU	CKS2	MCM2	CDC6	ECT2	DLGAP5	PRC1	CDC6	CDC6	CEP55	MCM6	PBK
38	SPC25	CCNB1	MCM3	MCM3	CDC6	TTK	NUF2	MKI67	FOXM1	CDC25C	KIF20A	HJURP
39	KNTC1	CCNB2	ECT2	ECT2	CENPU	PRC1	NEK2	MCM7	ECT2	MCM6	MELK	CDC25C
40	ZWINT	ANLN	MCM7	MCM7	CDKN3	MELK	KIF4A	ECT2	MKI67	KIF20A	HJURP	KIF2C

## Sheet: Sheet2_PPI
node_name	MCC	DMNC	MNC	Degree	EPC	BottleNeck	EcCentricity	Closeness	Radiality	Betweenness	Stress	ClusteringCoefficient
ZWINT	1310000000000	1.05156	15	15	7.506	1	0.20699	43.3333	4.22694	0	0	1
CDC7	720	0.71324	6	6	3.149	1	0.20699	38.75	4.12889	0	0	1
TRIP13	120	0.64826	5	5	3.698	1	0.20699	38.1667	4.1071	0	0	1
E2F8	720	0.71324	6	6	3.845	1	0.20699	37.8333	4.06353	0	0	1
TK1	2	0.30779	2	2	1.834	1	0.20699	36.1667	4.04174	0	0	1
FAM83D	2	0.30779	2	2	2.143	1	0.20699	32.3333	3.76938	0	0	1
GINS1	120	0.64826	5	5	2.465	1	0.20699	32.6667	3.7367	0	0	1
FANCI	2	0.30779	2	2	1.321	1	0.20699	28.9167	3.54061	0	0	1
LYVE1	2	0.30779	2	2	1.384	1	0.16559	27.9833	3.44256	0	0	1
STAB2	2	0.30779	2	2	1.333	1	0.16559	27.9833	3.44256	0	0	1
FCN2	2	0.30779	2	2	1.093	1	0.03226	2	0.06452	0	0	1
COLEC10	2	0.30779	2	2	1.085	1	0.03226	2	0.06452	0	0	1
FCN3	2	0.30779	2	2	1.084	1	0.03226	2	0.06452	0	0	1
SPC25	1310000000000	1.04101	16	16	7.68	1	0.20699	43.8333	4.23783	0.62821	8	0.96667
KNTC1	1310000000000	1.04101	16	16	7.128	1	0.20699	43.8333	4.23783	0.62821	8	0.96667
MKI67	92200000000000	1.14177	21	21	9.206	1	0.20699	46.75	4.32499	1.32206	32	0.9619
CDKN3	7190000000	1.00149	15	15	7.978	1	0.20699	43.5833	4.24873	0.46399	14	0.95238
NEK2	92200000000000	1.17155	26	26	11.277	1	0.20699	49.5	4.39035	9.91742	148	0.91692
KIF4A	92200000000000	1.19924	28	28	11.09	1	0.20699	50.4167	4.41214	5.13787	90	0.91534
UHRF1	48	0.58344	5	5	3.638	1	0.20699	37.9167	4.09621	0.20667	4	0.9
CENPW	48	0.58344	5	5	3.099	1	0.20699	35.8333	3.9328	0.15385	2	0.9
TTK	92200000000000	1.20429	32	32	12.335	1	0.20699	52.4167	4.45572	7.71091	152	0.87903
ANLN	1452240	0.84883	12	12	6.229	1	0.20699	41.75	4.19426	0.93412	18	0.87879
PTTG1	92200000000000	1.11718	27	27	10.721	1	0.20699	50	4.40125	14.3302	196	0.86325
FOXM1	85300000000000	1.10541	20	21	9.003	3	0.20699	47.0833	4.34677	162.111	1908	0.85714
KPNA2	744	0.65858	7	7	4.387	1	0.20699	39	4.118	0.51905	8	0.85714
GMNN	45480	0.7582	10	10	4.48	1	0.20699	41.25	4.20515	2.14364	22	0.84444
CKS2	958000000	0.87129	15	15	6.912	1	0.20699	43.6667	4.24873	5.84593	64	0.82857
NUF2	92200000000000	1.08408	29	29	11.563	1	0.20699	50.5	4.39035	12.7483	158	0.81773
CEP55	92200000000000	1.12718	33	33	12.465	1	0.27599	53.5	4.51019	29.1359	478	0.81439
KIF20A	92200000000000	1.15985	36	36	13.242	1	0.27599	54.6667	4.52108	20.5217	426	0.81429
MELK	92200000000000	1.10762	32	32	11.919	1	0.27599	52.6667	4.4775	18.5607	348	0.80847
CENPM	1310000000000	0.89618	18	18	8.359	1	0.20699	44.8333	4.25962	16.6042	164	0.79739
CENPU	1310000000000	0.89618	18	18	8.111	1	0.20699	44.8333	4.25962	16.6042	164	0.79739
RACGAP1	92200000000000	0.99178	25	25	10.332	1	0.20699	49.25	4.40125	90.2936	1488	0.78667
NUSAP1	92200000000000	1.10923	37	37	13.216	1	0.27599	55.5	4.55376	42.8751	676	0.77177
PBK	92200000000000	1.07444	35	35	12.595	5	0.20699	54.25	4.51019	43.4766	532	0.76134
HJURP	92200000000000	0.95395	25	25	9.88	2	0.20699	48.75	4.36856	36.4965	346	0.75667
CDC25C	5041	0.76834	7	8	4.928	3	0.20699	40.25	4.18336	28.6906	640	0.75
KIF2C	92200000000000	1.08728	39	39	13.516	1	0.27599	56.1667	4.55376	36.0786	588	0.74359
NCAPG	92200000000000	1.05585	36	36	12.463	1	0.20699	54.9167	4.53198	52.2439	606	0.74127
DLGAP5	92200000000000	1.06831	38	38	12.449	1	0.20699	55.75	4.54287	58.534	702	0.73684
PRC1	92200000000000	0.99704	31	31	12.049	1	0.20699	52.4167	4.4775	131.008	1918	0.73548
ASPM	92200000000000	1.05528	37	37	13.225	1	0.20699	55.25	4.53198	53.8132	614	0.73423
AURKA	92200000000000	1.05312	37	37	12.776	1	0.27599	56.1667	4.59734	95.7386	1026	0.73273
ECT2	93400000000	0.83088	19	19	8.263	1	0.20699	46.4167	4.34677	82.5793	1170	0.72515
UBE2C	92200000000000	1.03801	37	37	13.05	4	0.27599	55.5	4.55376	181.608	1222	0.72222
DTL	600	0.62053	9	9	4.364	1	0.20699	40.9167	4.20515	4.91701	60	0.72222
TPX2	92200000000000	1.0242	36	36	12.876	3	0.27599	55	4.54287	164.527	1402	0.71905
NDC80	92200000000000	1.02636	40	40	13.032	1	0.20699	57.0833	4.58645	84.565	952	0.69615
MCM6	62760	0.70945	14	14	5.213	1	0.20699	43.75	4.28141	26.5406	468	0.69231
KIF11	92200000000000	0.99866	41	41	12.828	1	0.27599	57.5	4.59734	79.736	1166	0.67195
RRM2	92200000000000	0.95816	37	37	12.432	2	0.20699	55.5833	4.55376	93.9157	998	0.66667
UBE2S	4	0.30898	3	3	2.163	1	0.20699	35.6667	3.97637	2.87537	26	0.66667
RNASEH2A	4	0.30898	3	3	1.835	1	0.20699	31.25	3.68223	0.18182	2	0.66667
BUB1B	92200000000000	0.99337	42	42	13.435	1	0.27599	57.6667	4.58645	83.5768	870	0.66318
CDC6	483000000	0.76764	20	20	8.253	1	0.20699	46.9167	4.35767	30.5142	292	0.65789
AURKB	92200000000000	0.95336	42	42	13.553	1	0.27599	57.8333	4.59734	89.5411	1106	0.63647
HMMR	21800000	0.84459	14	16	7.001	4	0.20699	44	4.24873	324.742	2266	0.63333
OIP5	46152	0.62588	13	13	5.863	1	0.20699	41.75	4.16157	14.1868	138	0.62821
TYMS	479000000	0.70519	18	18	7.71	3	0.20699	45.75	4.32499	85.1833	842	0.62745
TOP2A	92200000000000	0.94677	44	44	13.265	5	0.27599	59.3333	4.65181	150.381	1738	0.62262
MCM7	11300000	0.69687	19	19	7.208	2	0.27599	46.6667	4.36856	93.6838	1346	0.60819
MAD2L1	92200000000000	0.89769	42	42	13.221	2	0.27599	58.3333	4.63002	137.486	1476	0.5993
MCM3	8483284	0.68781	20	20	7.164	2	0.27599	47.1667	4.37946	101.957	1416	0.58947
BUB1	92200000000000	0.90814	47	47	14.379	1	0.27599	60.8333	4.68449	162.911	1778	0.58464
CCNB1	92200000000000	0.86928	48	48	14.676	1	0.27599	61	4.6736	159.808	1868	0.55585
MCM2	11100000	0.69395	20	21	7.163	2	0.20699	47.5833	4.37946	196.652	1908	0.5381
CCNB2	92200000000000	0.8498	50	50	14.566	2	0.27599	62	4.69539	242.288	2350	0.53633
CCNA2	92200000000000	0.82393	50	50	14.525	1	0.27599	62	4.69539	238.137	2328	0.52
CDC20	92200000000000	0.81435	52	52	14.913	19	0.27599	63	4.71718	291.479	2680	0.50754
CDK1	92200000000000	0.73366	58	59	15.498	9	0.27599	67.1667	4.83701	794.26	4234	0.42665
RFC4	6987	0.57432	14	17	5.453	4	0.27599	45.3333	4.32499	350.308	2036	0.38235
UBE2T	4	0.30779	2	4	1.959	2	0.20699	34.8333	3.90011	18.83	102	0.33333
RHOB	8	0.46346	3	5	2.398	2	0.16559	33.6167	3.79117	150.833	2292	0.3
CDKN2A	3	0	1	3	1.729	2	0.16559	32.45	3.75849	150.319	1498	0
IGFBP3	2	0	1	2	1.069	3	0.03226	2	0.1129	2	2	0
EZH2	1	0	1	1	1.566	1	0.20699	35.5	4.01995	0	0	0
RAD51AP1	1	0	1	1	1.21	1	0.20699	28.0833	3.50792	0	0	0
DEPDC1B	1	0	1	1	1.074	1	0.13799	23.1833	2.97411	0	0	0
CDKN2C	1	0	1	1	1.073	1	0.13799	22.7667	2.94143	0	0	0
IGFALS	1	0	1	1	1.045	1	0.01613	1.5	0.09677	0	0	0
GPC3	1	0	1	1	1.028	1	0.01613	1.5	0.09677	0	0	0
NPY1R	1	0	1	1	1.061	1	0.02151	1	0.06452	0	0	0
CXCL12	1	0	1	1	1.061	1	0.02151	1	0.06452	0	0	0
MT1H	1	0	1	1	1.045	1	0.02151	1	0.06452	0	0	0
MT1G	1	0	1	1	1.045	1	0.02151	1	0.06452	0	0	0
PSPH	1	0	1	1	1.041	1	0.02151	1	0.06452	0	0	0
PHGDH	1	0	1	1	1.041	1	0.02151	1	0.06452	0	0	0
LY6E	1	0	1	1	1.041	1	0.02151	1	0.06452	0	0	0
CD109	1	0	1	1	1.041	1	0.02151	1	0.06452	0	0	0
IL33	1	0	1	1	1.037	1	0.02151	1	0.06452	0	0	0
IL1RAP	1	0	1	1	1.037	1	0.02151	1	0.06452	0	0	0
